# Supplementary material for: The Correlation between Physical Crosslinking and Water-Soluble Drug Release from Chitosan-Based Microparticles
Source: MDPI journal article supplement (doi:10.3390/pharmaceutics12050455), 2020-05-16
Supplement: s1 [file s1]

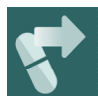

## Supplementary Materials: The Correlation between Physical Crosslinking and Water-Soluble Drug Release from Chitosan-Based

Emilia Szymańska, Katarzyna Woś-Latosi, Julia Jacyna, Magdalena Dąbrowska, Joanna Potaś, Michał Jan Markuszewski and Katarzyna Winnicka

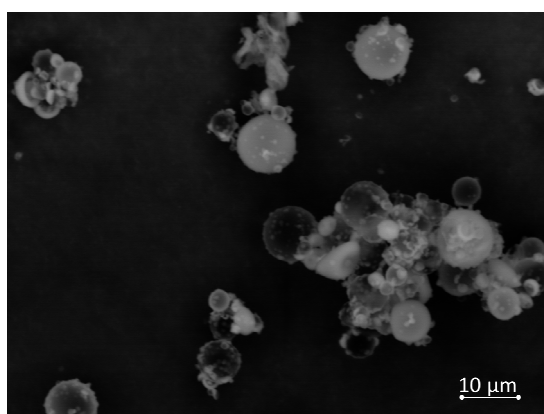

**Figure S1.** SEM image of zidovudine- free microparticles with chitosan glutamate and beta-glycerophosphate disodium in ratio 2:1; original magnification  $\times 2000$ .
